# Supplementary material
Source: publisher figshare collection journal article supplement (https://acs.figshare.com/ndownloader/files/5751417)

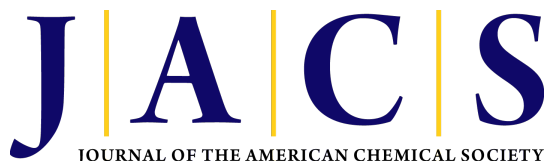

J | A | C | S  
JOURNAL OF THE AMERICAN CHEMICAL SOCIETY

J. Am. Chem. Soc., 1996, 118(47), 11701-11714, DOI: [10.1021/ja961788h](https://doi.org/10.1021/ja961788h)

#### Terms & Conditions

Electronic Supporting Information files are available without a subscription to ACS Web Editions. The American Chemical Society holds a copyright ownership interest in any copyrightable Supporting Information. Files available from the ACS website may be downloaded for personal use only. Users are not otherwise permitted to reproduce, republish, redistribute, or sell any Supporting Information from the ACS website, either in whole or in part, in either machine-readable form or any other form without permission from the American Chemical Society. For permission to reproduce, republish and redistribute this material, requesters must process their own requests via the RightsLink permission system. Information about how to use the RightsLink permission system can be found at <http://pubs.acs.org/page/copyright/permissions.html>

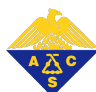

ACS Publications

MOST TRUSTED. MOST CITED. MOST READ.

Copyright © 1996 American Chemical Society

**Table 1.** Quantification of the Ligation Product Resulting from Treatment of the Purified Topoisomerase I - DNA Complex with Acceptor Oligonucleotides **I - IV**, as a Function of pH

|            | pH  | % ligation <sup>a</sup> |
|------------|-----|-------------------------|
| <b>I</b>   | 7.5 | 100                     |
|            | 8.0 | 96.7                    |
|            | 8.5 | 85.8                    |
|            | 9.0 | 91.5                    |
| <b>II</b>  | 7.5 | 32.8                    |
|            | 8.0 | 33.7                    |
|            | 8.5 | 31.2                    |
|            | 9.0 | 32.6                    |
| <b>III</b> | 7.5 | 3.8                     |
|            | 8.0 | 3.1                     |
|            | 8.5 | 2.5                     |
|            | 9.0 | 3.1                     |
| <b>IV</b>  | 7.5 | 2.6                     |
|            | 8.0 | 4.0                     |
|            | 8.5 | 8.4                     |
|            | 9.0 | 12.0                    |

<sup>a</sup>The calculated values were normalized to the ligation value obtained for **I**.

## Legends to Figures

**Figure 1.** Autoradiogram of a 20% denaturing polyacrylamide gel demonstrating cleavage of the 5'  $^{32}\text{P}$ -end labeled partial duplex and subsequent ligation of acceptor oligonucleotides **I** and **II**: lane 1, partial duplex + **I** in the absence of topoisomerase I; lane 2, partial duplex + **I** in the presence of topoisomerase I; lane 3, partial duplex + **II** in the absence of topoisomerase I; lane 4, partial duplex + **II** in the presence of topoisomerase I. The heterogeneity of the cleavage bands reflects incomplete digestion by proteinase K.<sup>8</sup>

**Figure 2.** Autoradiogram illustrating DNA sequence analysis of the product resulting from ligation of the acceptor strand to the truncated DNA - enzyme binary complex.

**Figure 3.** Phosphorimager analysis of the gel illustrated as Figure 5 in the text.

**Figure 4.** Phosphorimager analysis of a 20% denaturing polyacrylamide gel illustrating the ligation of **I** and **III** as a function of  $\text{Mg}^{2+}$  and  $\text{Mn}^{2+}$  utilizing the 5'- $^{32}\text{P}$  end labeled topoisomerase I - DNA complex: lane 1, topoisomerase I - DNA complex + **III** in the presence of  $\text{Mn}^{2+}$ ; lane 2, topoisomerase I - DNA complex + **III** in the presence of  $\text{Mg}^{2+}$ ; lane 3, topoisomerase I - DNA complex + **I** in the presence of  $\text{Mn}^{2+}$ ; lane 4, topoisomerase I - DNA complex + **I** in the presence of  $\text{Mg}^{2+}$ .

**Figure 5.** Phosphorimager quantification of the ligation of **IV** as a function of pH.

**Figure 6.** Autoradiogram of a 20% denaturing polyacrylamide gel illustrating exonuclease III digestion of the enzymatic ligation products derived from acceptors **I** and **II**, in comparison with the digestion products of authentic synthetic standards. Lane 1, G; lane 2, A + G; lane 3, exonuclease III treatment of the product resulting from ligation of oligonucleotide **I** with the topoisomerase I - DNA covalent complex; lane 4, exonuclease III treatment of the product resulting from ligation of oligonucleotide **II** with the topoisomerase I - DNA covalent complex; lane 5, exonuclease III treatment of the authentic synthetic standard containing nucleoside **2a** at site 1; lane 6, exonuclease III treatment of the authentic synthetic standard containing normal 3' → 5' phosphodiester bonds at all positions. The additional site of stalling in the enzymatic product lane (lane 4) was also observed with the synthetic product in other experiments.

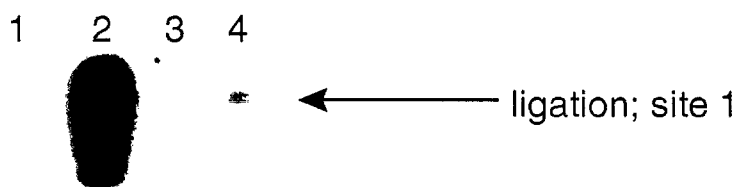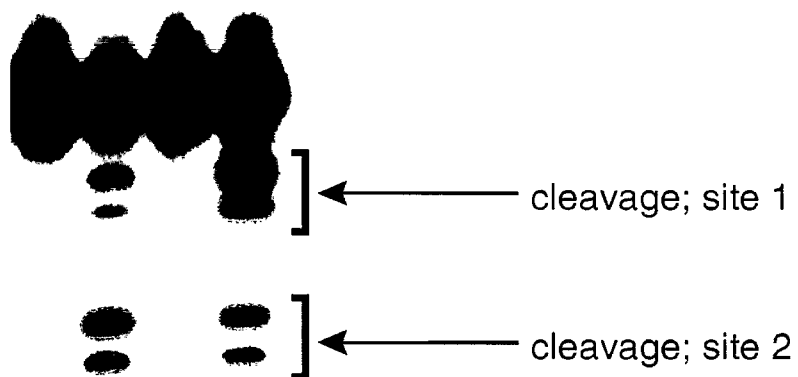

Substrate

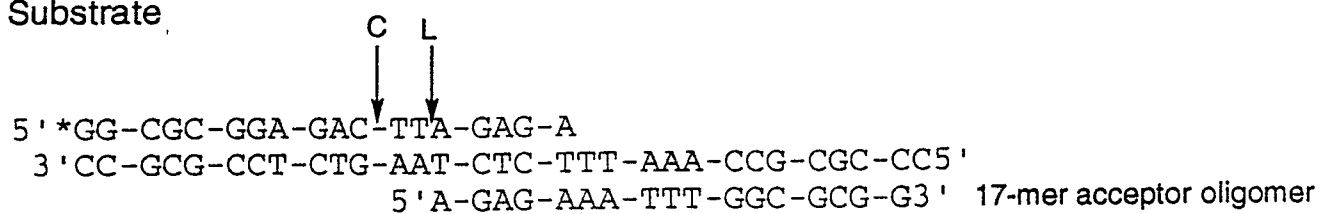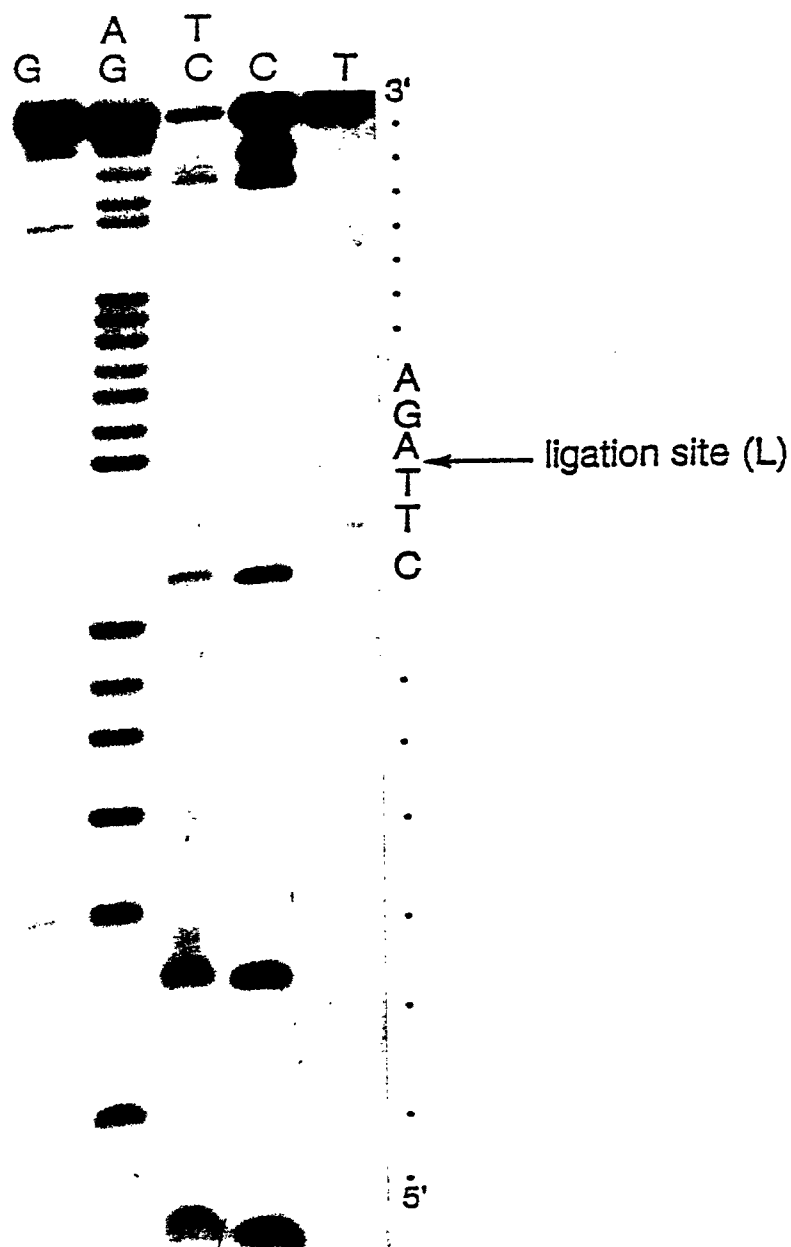

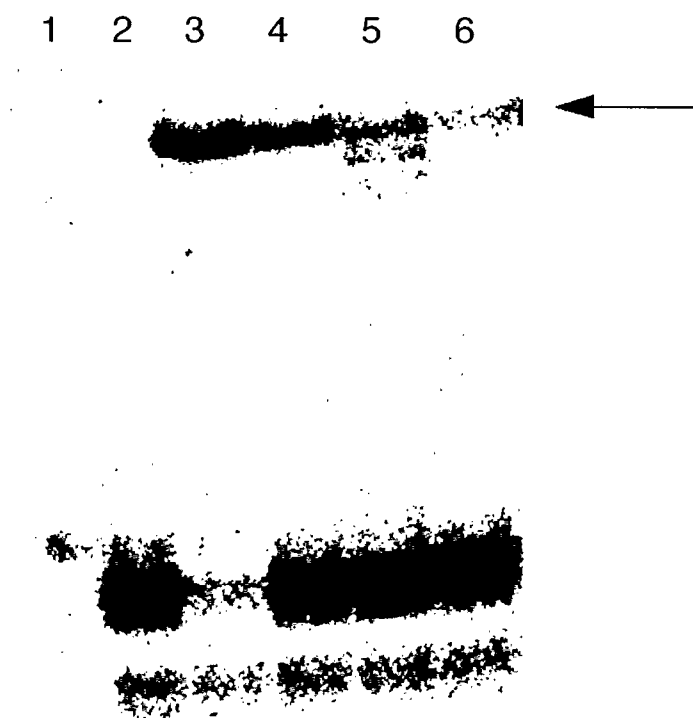

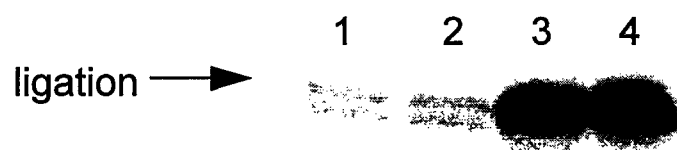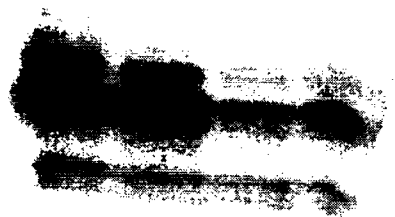



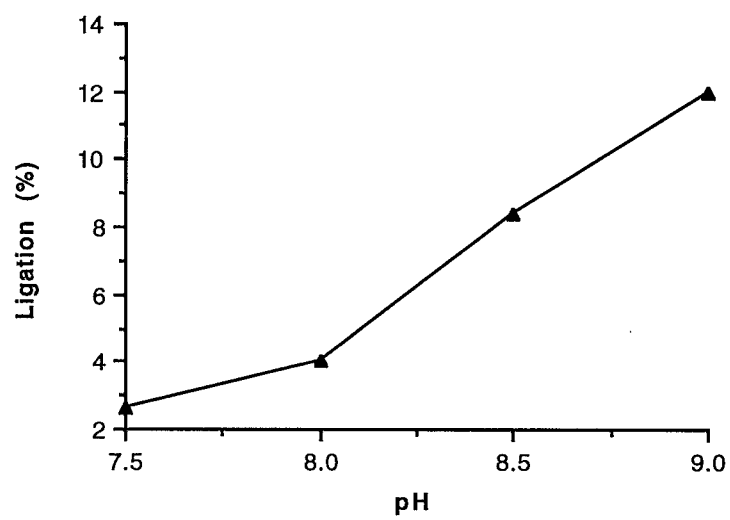

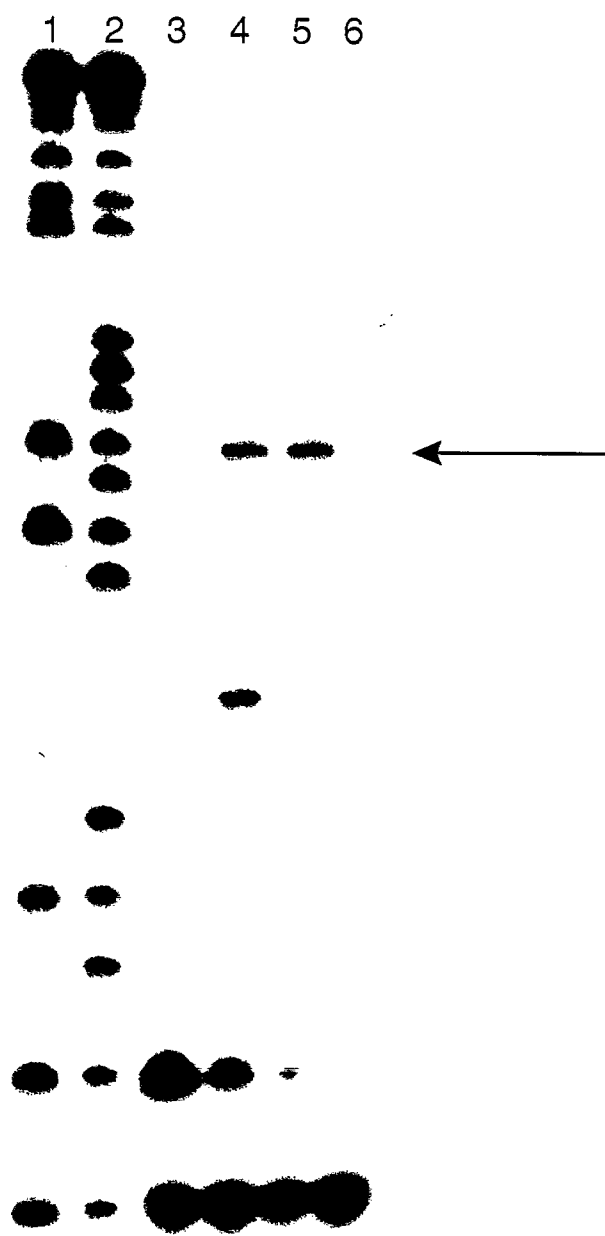

Supplement: Supplementary file 1 [file 5751417]
